# Supplementary material for: Real-time brain-machine interface in non-human primates achieves high-velocity prosthetic finger movements using a shallow feedforward neural network decoder
Source: PubMed Central journal article supplement (PMC9653378; doi:10.1038/s41467-022-34452-w), 2022-11-12
Supplement: 41467_2022_34452_MOESM1_ESM.pdf [file 41467_2022_34452_MOESM1_ESM.pdf]

**File name: Supplementary Movie 1**

**Description: RK for a random finger task.** The video captures the average performance of 992 the RK as measured by throughput (1.4 bps) over the two days of testing for Monkey N when 993 comparing RK and RN.

**File name: Supplementary Movie 2**

**Description: RN for a random finger task.** The video captures the average performance of 996 the RN decoder as measured by throughput (2.3 bps) over the two days of testing for Monkey N 997 when comparing RK and RN.

**File name: Supplementary Movie 3**

**Description: RN for a center-out finger task.** The video captures the peak performance of 1000 the RN decoder as measured by throughput (3.2 bps) in one day of testing of the RN for Monkey 1001 N on a typical center-out finger task.
